# Supplementary material for: Genetic Association of Hepatitis C-Related Mixed Cryoglobulinemia: A 10-Year Prospective Study of Asians Treated with Antivirals
Source: PubMed Central journal article supplement (PMC7998980; doi:10.3390/v13030464), 2021-03-11
Supplement: viruses-13-00464-s001.pdf [file viruses-13-00464-s001.pdf]

mg/velpatasvir  
100 mg qd) with  
or without  
Ribavirin

mg/velpatasvir  
100 mg qd) with  
or without  
Ribavirin

mg/velpatasvir  
100 mg qd) with or  
without Ribavirin

mg/velpatasvir  
100 mg qd) with or  
without Ribavirin

mg/velpatasvir  
100 mg qd) with  
or without  
Ribavirin

mg/velpatasvir  
100 mg qd)  
with or without  
Ribavirin

---

DAA: direct-acting antiviral agent; D: duration; W: weeks

**Supplementary Table 2. The 13 single-nucleotide polymorphisms evaluated in the study.**

| Gene   | SNP ID     | ID number of TaqMan assays | Chromosome | Location  | Risk allele | MAF     | Allele 2 |
|--------|------------|----------------------------|------------|-----------|-------------|---------|----------|
| IFNL3  | rs12979860 | C__7820464_10              | 19q13.2    | 39248147  | T           | 0.07532 | C        |
| ABCB1  | rs1045642  | C__7586657_20              | 7q21.12    | 87138645  | A           | 0.3571  | G        |
| HLA II | rs9461776  | C__30460277_20             | 6p21.32    | 32575735  | G           | 0.07171 | A        |
| NOTCH4 | rs2071286  | C__15861180_10             | 6p21.32    | 32179896  | T           | 0.1226  | C        |
| ACHE   | rs6976053  | C__32067460_10             | 7q22.1     | 100512119 | C           | 0.4056  | T        |
| ARNTL  | rs6486122  | C__2160490_10              | 11p15.2    | 13361524  | T           | 0.3909  | C        |
| PPARG  | rs11128603 | NA                         | 3p25.2     | 12385828  | G           | 0.03038 | A        |
| NAMPT  | rs61330082 | NA                         | 7q22.3     | 105926865 | T           | 0.4892  | C        |
| NAMPT  | rs2302559  | C__2673293_10              | 7q22.3     | 105903904 | T           | 0.1097  | C        |
| NAMPT  | rs10953502 | C__31761492_10             | 7q22.3     | 105892431 | C           | 0.1454  | T        |
| NAMPT  | rs2058539  | C__11613113_10             | 7q22.3     | 105916637 | C           | 0.1097  | A        |
| RETN   | rs1423096  | C__1394117_20              | 19p13.2    | 7674290   | C           | 0.28332 | T        |
| RETN   | rs1477341  | C__8351534_10              | 19p13.2    | 7671912   | A           | 0.47552 | T        |

IFNL3: interferon  $\lambda$ 3; ABCB1: ATP-binding cassette sub-family B member 1; HLA II: human leukocyte antigen class II; NOTCH4: neurogenic locus notch homolog protein 4; SERPINE1: Serpin family E member 1; ARNTL: aryl hydrocarbon receptor nuclear translocator-like protein 1; PPARG: peroxisome proliferator-activated receptor gamma; NAMPT: Nicotinamide phosphoribosyltransferase; RETN: resistin; NA: not assessable; MAF: minor allele frequency.

**Supplementary Table 3. Primer sequences used in the single-nucleotide polymorphisms of NAMPT-rs61330082.**

| <b>Genes</b> | <b>Primers</b> | <b>Sequences (5'-&gt;3')</b>  |
|--------------|----------------|-------------------------------|
| NAMPT        | NAMPT-F        | 5'- TGTTTCAAACCTCGTT GCTG -3' |
|              | NAMPT-R        | 5'- GAGGCATGGCTGAGACTTCTA -3' |

ScrFI for rs61330082—Allele C is cuttable, yielding two fragments of 65 and 138 bp; allele T is uncuttable, and the fragment is still 203 bp.

**Supplementary Table 4. Genetic analyses for various single-nucleotide polymorphisms with HCV RNA and mixed cryoglobulinemia.**

| SNPs       | A1 | A2 | Y   | allele1 | allele2 | geno11   | geno12   | geno22   | Geno <i>p</i>          | Trend <i>p</i>         | Allelic <i>p</i>       | Dom <i>p</i>          | Rec <i>p</i>           | Add <i>p</i>           | OR     | 95% CI OR     | Permu <i>p</i> |
|------------|----|----|-----|---------|---------|----------|----------|----------|------------------------|------------------------|------------------------|-----------------------|------------------------|------------------------|--------|---------------|----------------|
| rs11128603 | G  | A  | RNA | 0.03038 | 0.96962 | 0        | 0.060757 | 0.939243 | 0.8255                 | 0.671                  | 0.8283                 | 0.8255                | 1                      | 0.6715                 | 1.225  | 0.4789-3.135  | 0.6712         |
| rs11128603 | G  | A  | MC  | 0.03038 | 0.96962 | 0        | 0.060757 | 0.939243 | 0.7901                 | 0.6913                 | 0.7933                 | 0.7901                | 1                      | 0.6914                 | 1.112  | 0.6573-1.883  | 0.6998         |
| rs2071286  | T  | C  | RNA | 0.1226  | 0.8774  | 0.013903 | 0.217478 | 0.76862  | 0.01202                | 0.02822                | 0.03317                | 0.139                 | 0.0096                 | 0.02956                | 0.6448 | 0.4343-0.957  | 0.02862        |
| rs2071286  | T  | C  | MC  | 0.1226  | 0.8774  | 0.013903 | 0.217478 | 0.76862  | 0.7903                 | 0.5518                 | 0.5839                 | 0.6513                | 0.7873                 | 0.5519                 | 0.9216 | 0.7041-1.206  | 0.5525         |
| rs9461776  | G  | A  | RNA | 0.07171 | 0.92829 | 0.010956 | 0.121514 | 0.86753  | 0.007141               | 0.006055               | 0.006726               | 0.003383              | 1                      | 0.007159               | 0.5492 | 0.3548-0.85   | 0.00623        |
| rs9461776  | G  | A  | MC  | 0.07171 | 0.92829 | 0.010956 | 0.121514 | 0.86753  | 0.6394                 | 0.448                  | 0.4853                 | 0.3987                | 1                      | 0.4484                 | 1.137  | 0.816-1.584   | 0.4481         |
| rs1045642  | A  | G  | RNA | 0.3571  | 0.6429  | 0.128684 | 0.456778 | 0.414538 | 0.4185                 | 0.3394                 | 0.36                   | 0.7528                | 0.2161                 | 0.3399                 | 1.16   | 0.8554-1.573  | 0.3401         |
| rs1045642  | A  | G  | MC  | 0.3571  | 0.6429  | 0.128684 | 0.456778 | 0.414538 | 0.631                  | 0.7451                 | 0.744                  | 0.898                 | 0.3968                 | 0.7451                 | 0.9702 | 0.8083-1.164  | 0.7454         |
| rs6976053  | C  | T  | RNA | 0.4056  | 0.5944  | 0.287119 | 0.236971 | 0.47591  | 1.04X10 <sup>-12</sup> | 9.44x10 <sup>-11</sup> | 4.79x10 <sup>-17</sup> | 3.97x10 <sup>-8</sup> | 1.73x10 <sup>-12</sup> | 2.64x10 <sup>-09</sup> | 2.767  | 1.979-3.868   | 0.00001        |
| rs6976053  | C  | T  | MC  | 0.4056  | 0.5944  | 0.287119 | 0.236971 | 0.47591  | 0.3214                 | 0.3836                 | 0.2948                 | 0.8002                | 0.1846                 | 0.3837                 | 1.067  | 0.9222-1.234  | 0.3833         |
| rs10953502 | C  | T  | RNA | 0.1454  | 0.8546  | 0.061776 | 0.16731  | 0.770914 | 0.1107                 | 0.06614                | 0.03219                | 0.179                 | 0.068                  | 0.07314                | 1.832  | 0.9448-3.551  | 0.06896        |
| rs10953502 | C  | T  | MC  | 0.1454  | 0.8546  | 0.061776 | 0.16731  | 0.770914 | 0.283                  | 0.1125                 | 0.06938                | 0.1214                | 0.3663                 | 0.1136                 | 1.227  | 0.9523-1.582  | 0.1126         |
| rs2302559  | T  | C  | RNA | 0.1131  | 0.8869  | 0.015171 | 0.195954 | 0.788875 | 0.1058                 | 0.1044                 | 0.1152                 | 0.08215               | 0.5746                 | 0.1102                 | 1.885  | 0.8659-4.104  | 0.1059         |
| rs2302559  | T  | C  | MC  | 0.1131  | 0.8869  | 0.015171 | 0.195954 | 0.788875 | 0.9351                 | 0.7442                 | 0.749                  | 0.7252                | 1                      | 0.7442                 | 0.9497 | 0.6967-1.295  | 0.7481         |
| rs2058539  | C  | A  | RNA | 0.1097  | 0.8903  | 0.003871 | 0.211613 | 0.784516 | 0.3249                 | 0.1197                 | 0.1495                 | 0.165                 | 1                      | 0.1253                 | 1.877  | 0.8392-4.198  | 0.122          |
| rs2058539  | C  | A  | MC  | 0.1097  | 0.8903  | 0.003871 | 0.211613 | 0.784516 | 0.4868                 | 0.2046                 | 0.2499                 | 0.2173                | 1                      | 0.2052                 | 1.247  | 0.8862-1.754  | 0.2048         |
| rs61330082 | T  | C  | RNA | 0.4892  | 0.5108  | 0.192641 | 0.593074 | 0.214286 | 0.4819                 | 0.4915                 | 0.5827                 | 0.2723                | 1                      | 0.4917                 | 0.8695 | 0.5836-1.295  | 0.4996         |
| rs61330082 | T  | C  | MC  | 0.4892  | 0.5108  | 0.192641 | 0.593074 | 0.214286 | 0.4608                 | 0.8664                 | 0.888                  | 0.5713                | 0.3998                 | 0.8664                 | 0.9826 | 0.8011-1.205  | 0.8678         |
| rs6486122  | T  | C  | RNA | 0.3909  | 0.6091  | 0.219178 | 0.343444 | 0.437378 | 0.009836               | 0.7211                 | 0.708                  | 0.0948                | 0.1692                 | 0.7211                 | 0.954  | 0.7367-1.235  | 0.7158         |
| rs6486122  | T  | C  | MC  | 0.3909  | 0.6091  | 0.219178 | 0.343444 | 0.437378 | 0.1045                 | 0.03313                | 0.01738                | 0.05637               | 0.09375                | 0.03337                | 1.189  | 1.014-1.395   | 0.03284        |
| rs12979860 | T  | C  | RNA | 0.07532 | 0.92468 | 0.016521 | 0.11759  | 0.865889 | 0.005611               | 0.00264                | 0.000428               | 0.001238              | 0.4033                 | 0.005809               | 3.98   | 1.492-10.62   | 0.00428        |
| rs12979860 | T  | C  | MC  | 0.07532 | 0.92468 | 0.016521 | 0.11759  | 0.865889 | 0.06041                | 0.0215                 | 0.01452                | 0.0428                | 0.08676                | 0.0226                 | 0.6996 | 0.5146-0.951  | 0.0203         |
| rs1423096  | C  | T  | RNA | 0.28332 | 0.71668 | 0.087195 | 0.272885 | 0.639920 | 0.889963               | 0.7188                 | 0.83269                | 0.71832               | 0.99321                | 0.70869                | 1.180  | 0.478-2.908   | 0.8956         |
| rs1423096  | C  | T  | MC  | 0.28332 | 0.71668 | 0.087195 | 0.272885 | 0.639920 | 0.1932                 | 0.1953                 | 0.1023                 | 0.3852                | 0.22365                | 0.198                  | 0.829  | 0.625-1.099   | 0.2369         |
| rs1477341  | A  | T  | RNA | 0.47552 | 0.52448 | 0.257660 | 0.412359 | 0.329981 | 0.632123               | 0.63889                | 0.77236                | 0.2358                | 0.8236520              | 0.56321                | 0.7269 | 0.192-2.751   | 0.4463         |
| rs1477341  | A  | T  | MC  | 0.47552 | 0.52448 | 0.257660 | 0.412359 | 0.329981 | 0.7472                 | 0.8659                 | 0.7236                 | 0.5689                | 0.7963                 | 0.4332                 | 0.9552 | 0.7222-1.2638 | 0.7896         |

A1: allele 1 frequency; A2: allele 2 frequency; Y: dependent factor; RNA: HCV RNA; MC: mixed cryoglobulinemia; geno11: genotype 11 frequency; geno12: genotype 12 frequency; geno 22: genotype 22 frequency; Geno *p*: *p* values of genotypic test; Trend *p*: *p* values of trend test; Allelic *p*: *p* values of allelic test; Dom *p*: *p* values of associated test (genetic model=dominant); Rec *p*: *p* values of associated test (genetic model=recessive); Add *p*: *p* values of logistic regression(genetic model=additive) for qualitative trait; OR: odds ration; CI: confidence interval; Permu *p*: *p* values of permutation test (N=100000).

**Supplementary Table 5. IFNL3-rs12978960 variant distributions among various status.**

|                                     | CHC (n=934)    |                |                 | Spontaneous HCV clearance (n=109) |               |                 |
|-------------------------------------|----------------|----------------|-----------------|-----------------------------------|---------------|-----------------|
|                                     | MC (0) (n=384) | MC (1) (n=550) | <i>p</i> values | MC (0) (n=70)                     | MC (1) (n=39) | <i>p</i> values |
| IFNL3-rs12979860 CC genotype, n (%) | 314 (81.8)     | 477 (86.7)     | 0.011           | 67 (95.7)                         | 38 (97.4)     | 0.518           |
| ARNTL-rs6486122 TT genotype, n (%)  | 75 (19.5)      | 132 (24)       | 0.059           | 11 (15.7)                         | 6 (15.4)      | 0.191           |

CHC: chronic hepatitis C virus infection; MC: mixed cryoglobulinemia

**Supplementary Table 6. Genetic associations with pre-therapy cyoglobulinemic vasculitis.**

|                                                  | Univariate analyses  |              |                 |
|--------------------------------------------------|----------------------|--------------|-----------------|
|                                                  | OR                   | 95% CI OR    | <i>p</i> values |
| HCV RNA positivity                               | 3.53X10 <sup>7</sup> | 0.00-        | 0.996           |
| IFNL3-rs12979860 TT, TC, CC genotype (0, 1, 2)   | 0.762                | 0.292-1.993  | 0.58            |
| ABCB1-rs1045642 GG, GA, AA genotype (0, 1, 2)    | 1.337                | 0.71-2.516   | 0.368           |
| HLA II-rs9461776 GG, GA, AA genotype (0, 1, 2)   | 1.437                | 0.359-5.757  | 0.608           |
| NOTCH4-rs2071286 CC, CT, TT genotype (0, 1, 2)   | 0.368                | 0.088-1.544  | 0.172           |
| SERPINE1-rs6976053 TT, TC, CC genotype (0, 1, 2) | 1.091                | 0.644-1.848  | 0.746           |
| ARNTL-rs6486122 CC, CT, TT genotype (0, 1, 2)    | 0.948                | 0.535-1.679  | 0.854           |
| PPARG-rs11128603 GG, GA, AA genotype (0, 1, 2)   | 0.574                | 0.13-2.533   | 0.464           |
| NAMPT-rs61330082 CC, CT, TT genotype (0, 1, 2)   | 0.821                | 0.409-1.648  | 0.579           |
| NAMPT-rs2302559 CC, CT, TT genotype (0, 1, 2)    | 0.922                | 0.327-2.599  | 0.878           |
| NAMPT-rs10953502 CC, CT, TT genotype (0, 1, 2)   | 1.242                | 0.608-2.538  | 0.553           |
| NAMPT-rs2058539 CC, CT, TT genotype (0, 1, 2)    | 0.495                | 0.2-1.222    | 0.127           |
| RETN-rs1423096 CC, CT, TT genotype (0, 1, 2)     | 1.322                | 0.708-2.468  | 0.381           |
| RETN-rs1477341 AA, AT, AT genotype (0, 1, 2)     | 3.574                | 0.842-15.178 | 0.084           |

IFNL3: interferon  $\lambda$ 3; ABCB1: ATP binding cassette subfamily B member 1; HLA II: Human leucocyte antigen class II; NOTCH4: neurogenic locus notch homolog protein 4; SERPINE1: Serpin Family E Member 1; ARNTL: aryl hydrocarbon receptor nuclear translocator like; PPARG: peroxisome proliferator-activated receptor gamma; NAMPT: Nicotinamide phosphoribosyltransferase; OR: odds ratio.
